# Supplementary material for: Plasmodium knowlesi infection is associated with elevated circulating biomarkers of brain injury and endothelial activation
Source: bioRxiv or medRxiv preprint supplement (doi:10.1101/2024.04.25.24306382), 2024-04-26

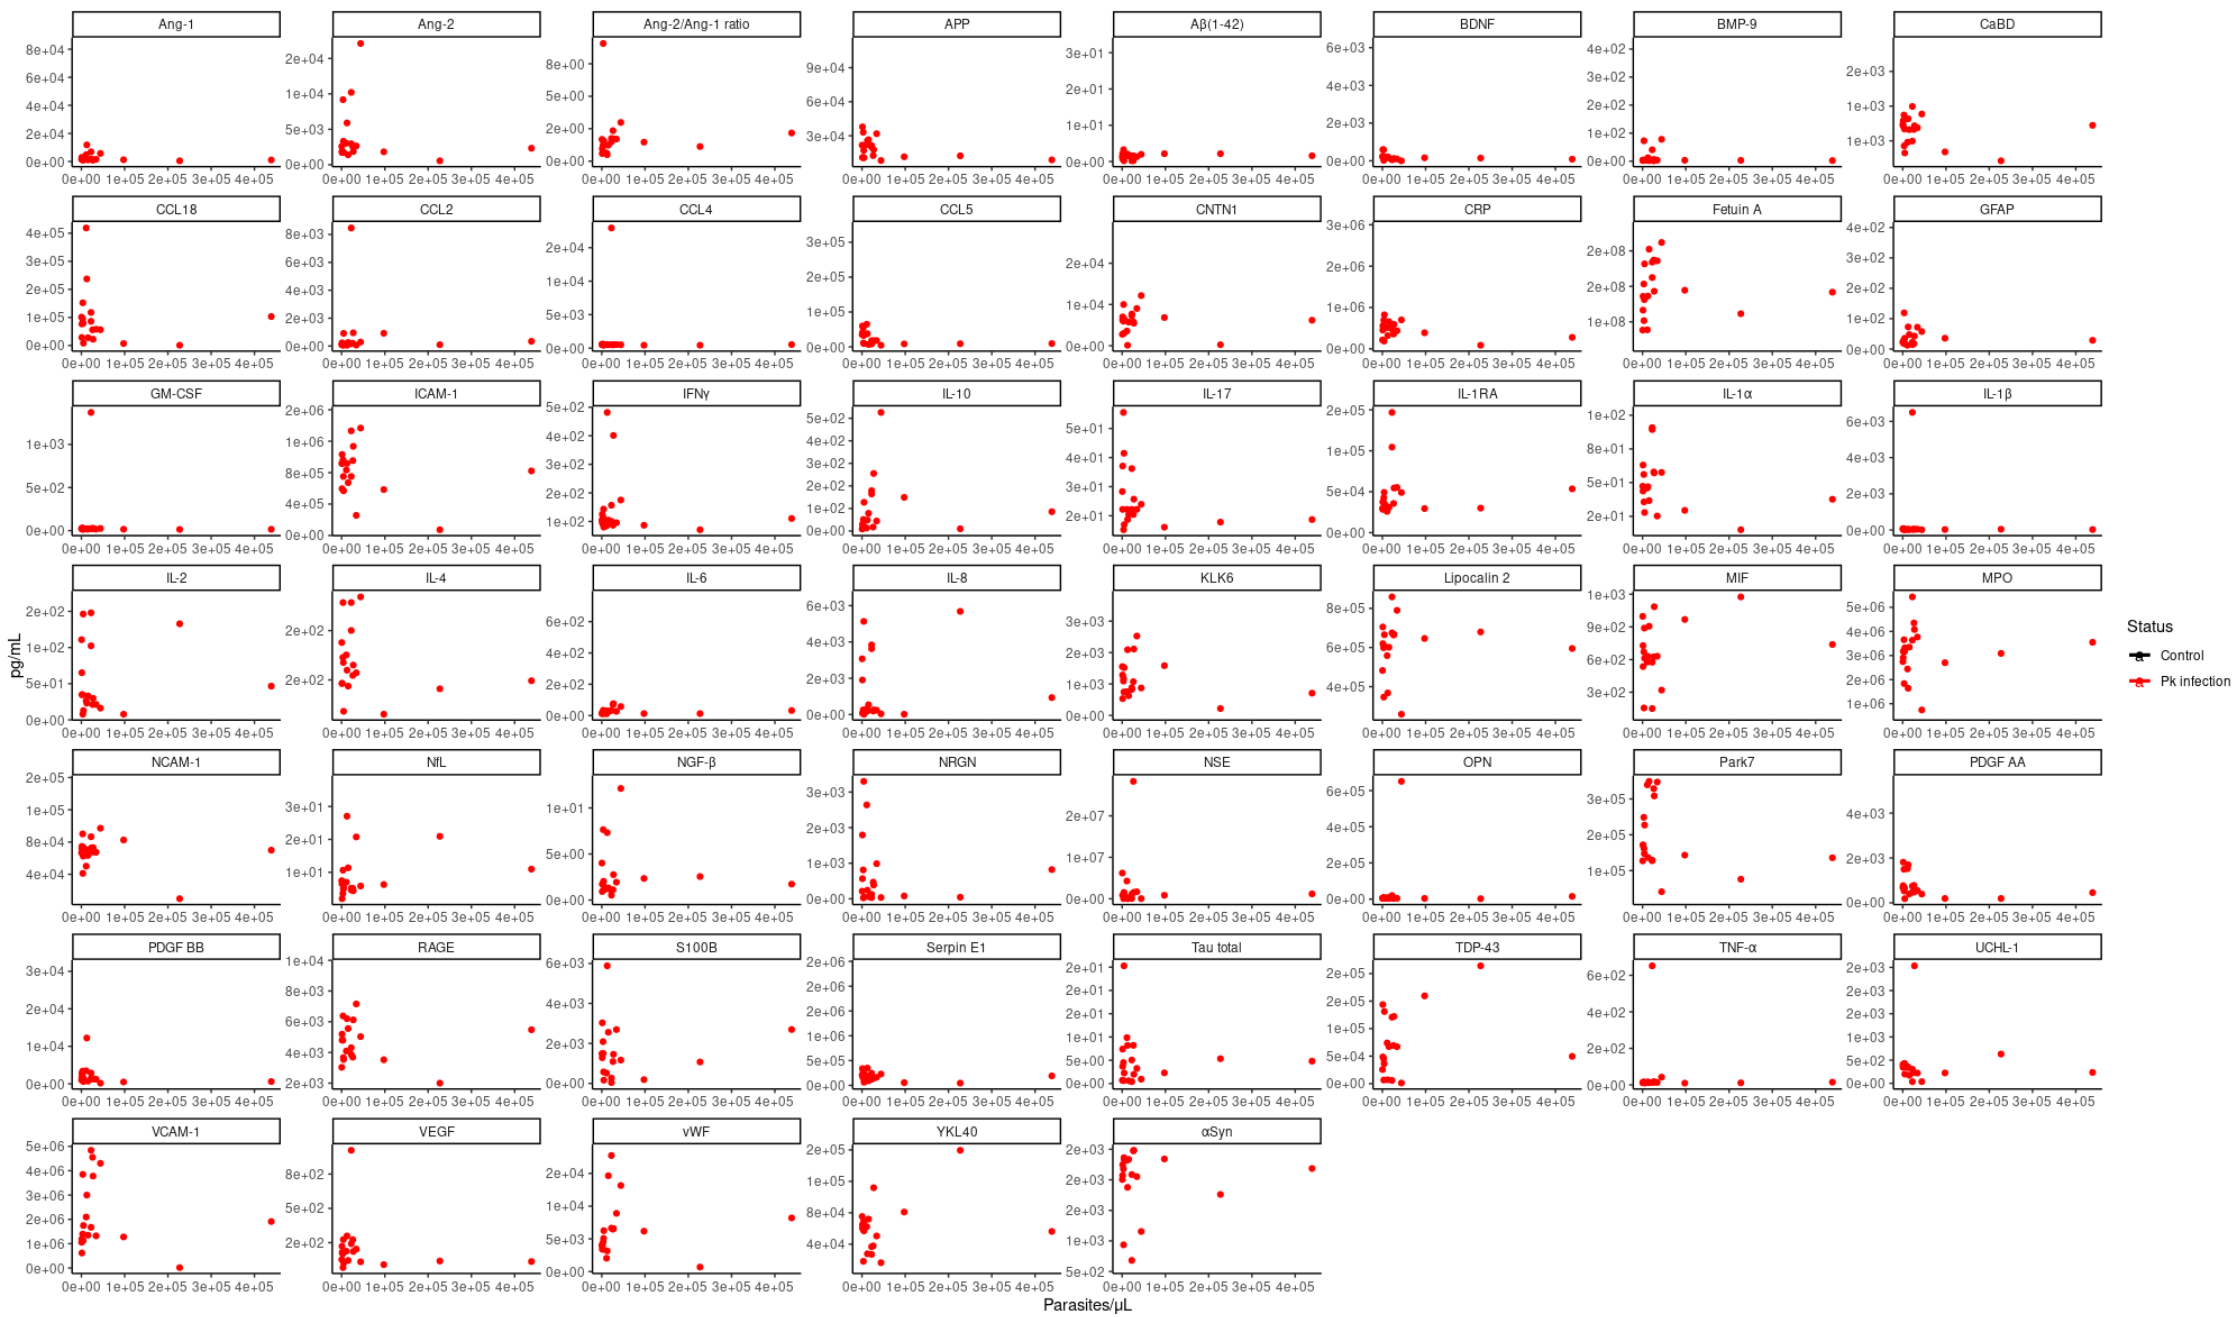

Supplement: Supplementary file [file media-5.pdf]
