# Supplementary material for: Plasmodium knowlesi infection is associated with elevated circulating biomarkers of brain injury and endothelial activation
Source: bioRxiv or medRxiv preprint supplement (doi:10.1101/2024.04.25.24306382), 2024-04-26
Supplement: Supplementary file [file media-8.pdf]

# Supplementary Table 1. Plasma biomarkers of infection and immune activation

| Pro-inflammatory cytokines |                                                                                                                                                                                                                                                                                                                                                                                                                                                                                                                                                                                    |
|----------------------------|------------------------------------------------------------------------------------------------------------------------------------------------------------------------------------------------------------------------------------------------------------------------------------------------------------------------------------------------------------------------------------------------------------------------------------------------------------------------------------------------------------------------------------------------------------------------------------|
| Biomarker                  | Clinical significance in malaria infection                                                                                                                                                                                                                                                                                                                                                                                                                                                                                                                                         |
| CRP                        |   In Ugandan children with <i>falciparum</i> cerebral malaria, plasma levels were significantly higher in retinopathy-positive patients compared with retinopathy-negative cases (1).                                                                                                                                                                                                                            |
|                            |    Whole blood and plasma concentrations were significantly elevated in malaria-infected patients from Malaysia and Indonesian Papua, compared with healthy controls. Patients were mono-infected with <i>Plasmodium falciparum</i> , <i>vivax</i> , <i>knowlesi</i> , <i>malariae</i> or <i>ovale</i> as confirmed by PCR (2). |
|                            |   In Cambodian asymptomatic participants, plasma levels were significantly higher in parasitaemic individuals compared with uninfected, age-, sex-, and village-matched controls. Patients had either a <i>falciparum</i> or <i>vivax</i> mono-infection, a <i>Plasmodium</i> infection with indeterminate species, or a mixed infection (3).                                                                    |
|                            |   In Brazilian patients with <i>falciparum</i> or <i>vivax</i> malaria, plasma levels were significantly higher in infected individuals compared with healthy controls. Levels were also higher in <i>vivax</i> patients than in <i>falciparum</i> cases (4).                                                                                                                                                    |
| GM-CSF                     | To the best of our knowledge, no studies have reported significant group differences in the context of human malaria.                                                                                                                                                                                                                                                                                                                                                                                                                                                              |
| IFN- $\gamma$              |   Plasma levels were significantly higher in Rwandan patients with severe malaria, compared with uncomplicated cases and controls (5).                                                                                                                                                                                                                                                                           |
|                            |  Plasma levels were significantly higher in Colombian patients with <i>vivax</i> severe malaria, compared with uncomplicated cases and healthy controls (6).                                                                                                                                                                                                                                                                                                                                      |
|                            |  In Brazilian patients with different forms of <i>vivax</i> malaria and controls, a network analysis revealed that IFN- $\gamma$ , TNF- $\alpha$ , and CCL5 were crucial in the profile of mild malaria cases (7).                                                                                                                                                                                                                                                                                |
| IL-1 $\alpha$              | To the best of our knowledge, no studies have reported significant group differences in the context of human malaria.                                                                                                                                                                                                                                                                                                                                                                                                                                                              |
| IL-1 $\beta$ *             |    A meta-analysis revealed that IL-1 $\beta$ blood levels were higher in severe malaria patients compared with uncomplicated cases. <i>Plasmodium spp.</i> was a confounder in the meta-analysis, showing no difference in IL-1 $\beta$ levels between <i>falciparum</i> -infected groups (8).                                 |
|                            |  In Indian patients with <i>falciparum</i> malaria, IL-1 $\beta$ levels were significantly the highest in severe cases with no brain injury, compared with other groups (9).                                                                                                                                                                                                                                                                                                                      |
|                            |  In Beninese children with <i>falciparum</i> cerebral malaria, plasma levels were significantly higher in fatal cases compared with those who survived (10).                                                                                                                                                                                                                                                                                                                                      |
| IL-2                       |  Compared with Mozambican adults with life-long exposure to <i>falciparum</i> malaria, Spanish travellers diagnosed with malaria had significantly higher serum IL-2 levels (11,12).                                                                                                                                                                                                                                                                                                             |
| IL-6*                      |   Plasma levels were significantly higher in Rwandan patients with severe malaria, compared with uncomplicated cases and controls (5).                                                                                                                                                                                                                                                                       |
|                            |  Plasma IL-6 levels were significantly higher in Colombian patients with <i>vivax</i> severe malaria, compared with uncomplicated cases and healthy controls (6).                                                                                                                                                                                                                                                                                                                               |
|                            |  Plasma levels were increased in Brazilian patients with <i>vivax</i> malaria, compared with non-infected subjects with previous malaria episodes. Infected patients showed a strong correlation between CCL2 and IL-6 plasma levels, and moderate correlations between IL-6 and IL-10 (13).                                                                                                                                                                                                    |
|                            |  In Pakistani patients with <i>vivax</i> malaria, plasma levels were significantly higher in uncomplicated cases than healthy controls, and in complicated cases than in uncomplicated ones (14).                                                                                                                                                                                                                                                                                               |
| IL-8                       |  In Beninese children with <i>falciparum</i> cerebral malaria, plasma levels were significantly higher in fatal cases compared with those who survived. In the former, IL-8 was identified as a risk factor for death by multivariate analysis (10).                                                                                                                                                                                                                                            |
| IL-17A                     |  Plasma levels were significantly higher in Ghanian children with severe <i>falciparum</i> malaria, compared with uncomplicated cases and non-malaria febrile controls (15).                                                                                                                                                                                                                                                                                                                    |
|                            |  In Indian patients with <i>falciparum</i> malaria, plasma levels were higher in patients with multi-organ dysfunction compared with other severe malaria subgroups, suggesting IL-17 plays a role in renal inflammatory pathology during <i>falciparum</i> infection (16).                                                                                                                                                                                                                     |

|                                |                                                                                   |                                                                                                                                                                                                                                                                        |
|--------------------------------|-----------------------------------------------------------------------------------|------------------------------------------------------------------------------------------------------------------------------------------------------------------------------------------------------------------------------------------------------------------------|
|                                |   | Plasma levels were significantly higher in Rwandan patients with severe malaria, compared with uncomplicated cases and controls (5).                                                                                                                                   |
|                                |  | Plasma levels were significantly higher in Brazilian patients with <i>vivax</i> malaria, compared with previously exposed, non-infected subjects and unexposed healthy donors (13).                                                                                    |
| <b>MIF</b>                     |  | Host MIF plasma concentrations positively correlated with <i>vivax</i> MIF levels in the plasma of Chinese patients with uncomplicated malaria (17).                                                                                                                   |
| <b>MPO</b>                     |  | In Cameroonian participants, plasma MPO levels were significantly higher in patients with <i>falciparum</i> malaria when compared with negative controls (18).                                                                                                         |
| <b>TNF-<math>\alpha</math></b> |  | Serum levels were significantly higher in Indian patients with <i>falciparum</i> severe malaria and cerebral malaria, compared with healthy controls (19).                                                                                                             |
|                                |  | In Beninese children with <i>falciparum</i> cerebral malaria, plasma levels were significantly higher in fatal cases compared with those who survived (10).                                                                                                            |
|                                |  | TNF- $\alpha$ -producing monocytes were significantly lower in Malawian children with <i>falciparum</i> malaria compared with healthy controls. Cerebral malaria cases had the lowest values (20).                                                                     |
|                                |  | Plasma levels were significantly higher in Rwandan patients with severe malaria, compared with uncomplicated cases and controls (5).                                                                                                                                   |
|                                |  | In Brazilian patients with different forms of <i>vivax</i> malaria and controls, a network analysis revealed that IFN- $\gamma$ , TNF- $\alpha$ , and CCL5 were crucial in the profile of mild malaria cases (7).                                                      |
|                                |  | In Pakistani patients with <i>vivax</i> malaria, plasma levels were significantly higher in complicated cases compared with uncomplicated ones. TNF- $\alpha$ , IL-10, ICAM-1 and VCAM-1 were the best individual predictors of complicated <i>vivax</i> malaria (14). |

### Anti-inflammatory cytokines

| Biomarker     | Clinical significance in malaria infection                                                                                                                                                                                                                                                                                                                                                                                |
|---------------|---------------------------------------------------------------------------------------------------------------------------------------------------------------------------------------------------------------------------------------------------------------------------------------------------------------------------------------------------------------------------------------------------------------------------|
| <b>IL-1RA</b> |  Most abundant cytokine measured in the serum of Malaysian Borneo patients with <i>falciparum</i> , <i>vivax</i> , or <i>knowlesi</i> malaria. Serum levels correlated with parasitaemia in subjects infected with any of the parasite species, and was associated with complications in <i>knowlesi</i> -infected patients (21).        |
| <b>IL-4**</b> |  Plasma levels were significantly higher in Colombian patients with <i>vivax</i> severe malaria, compared with uncomplicated cases and healthy controls (6).                                                                                                                                                                             |
|               |  In Brazilian patients with different forms of <i>vivax</i> malaria and controls, a network analysis revealed a protective role of IL-4 and IL-10 in non-infected and asymptomatic patients (7).                                                                                                                                         |
| <b>IL-10</b>  |  In Beninese children with <i>falciparum</i> cerebral malaria, plasma levels were significantly higher in fatal cases compared with those who survived (10).                                                                                                                                                                             |
|               |  Plasma levels were significantly higher in Rwandan patients with severe malaria, compared with uncomplicated cases and controls (5).                                                                                                                                                                                                    |
|               |  Plasma levels were significantly higher in Colombian patients with <i>vivax</i> severe malaria, compared with uncomplicated cases and healthy controls (6).                                                                                                                                                                            |
|               |  IL-10 production was only observed in Brazilian patients with <i>vivax</i> malaria, compared with previously exposed, non-infected subjects and unexposed healthy donors. Infected patients presented a moderate correlation between IL-10 and IL-6 plasma levels (13).                                                               |
|               |  In Brazilian patients with different forms of <i>vivax</i> malaria and controls, a network analysis revealed a protective role of IL-10 and IL-4 in non-infected and asymptomatic <i>vivax</i> patients (7).                                                                                                                          |
|               |  In Pakistani patients with <i>vivax</i> malaria, plasma levels were significantly higher in uncomplicated cases than healthy controls, and higher again in complicated cases compared with uncomplicated ones. IL-10, TNF- $\alpha$ , ICAM-1 and VCAM-1 were the best individual predictors of complicated <i>vivax</i> malaria (14). |

### Chemokines

| Biomarker   | Clinical significance in malaria infection                                                                                                                                                                                                                                                                                     |
|-------------|--------------------------------------------------------------------------------------------------------------------------------------------------------------------------------------------------------------------------------------------------------------------------------------------------------------------------------|
| <b>CCL2</b> |  Plasma levels were significantly higher in Colombian patients with <i>vivax</i> severe malaria, compared with uncomplicated cases and healthy controls (6).                                                                                |
|             |  Plasma levels were significantly increased in Brazilian patients with <i>vivax</i> malaria, compared with previously exposed, uninfected subjects. Infected patients showed a strong correlation between CCL2 and IL-6 plasma levels (13). |

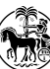

|              |                                                                                   |                                                                                                                                                                                                                                                                              |
|--------------|-----------------------------------------------------------------------------------|------------------------------------------------------------------------------------------------------------------------------------------------------------------------------------------------------------------------------------------------------------------------------|
| <b>CCL4</b>  |   | Plasma levels were significantly higher in Brazilian patients with acute <i>falciparum</i> and <i>vivax</i> malaria, compared with healthy controls. During the convalescent phase, levels were higher in <i>falciparum</i> patients as compared to <i>vivax</i> cases (22). |
| <b>CCL5</b>  |  | Serum levels were significantly lower in Indian patients with <i>falciparum</i> severe malaria, compared with uncomplicated cases and healthy controls (23).                                                                                                                 |
|              |  | Plasma levels were significantly lower in Brazilian patients with <i>vivax</i> malaria, compared with previously exposed, non-infected subjects and unexposed healthy donors (13).                                                                                           |
|              |  | In Brazilian patients with different forms of <i>vivax</i> malaria and controls, a network analysis revealed that CCL5, IFN- $\gamma$ , and TNF- $\alpha$ were crucial in the profile of mild malaria cases (7).                                                             |
| <b>CCL18</b> |                                                                                   | To the best of our knowledge, no studies have reported significant group differences in the context of human malaria.                                                                                                                                                        |

**Other immune markers**

| Biomarker   | Description                                                                                                                                    | Clinical significance                                                                                                                                                                                                                                                                                                                            |
|-------------|------------------------------------------------------------------------------------------------------------------------------------------------|--------------------------------------------------------------------------------------------------------------------------------------------------------------------------------------------------------------------------------------------------------------------------------------------------------------------------------------------------|
| <b>OPN</b>  | Extracellular matrix bone protein. It can act as a cytokine, enhancing production of IFN- $\gamma$ and IL-12 and reducing production of IL-10. |  Plasma concentrations in Ugandan infants with <i>falciparum</i> malaria were inversely correlated with <i>falciparum</i> -specific atypical memory B cells, suggesting that OPN could have a role in the acquisition of natural immunity against malaria (24). |
|             |                                                                                                                                                |  Plasma levels were significantly higher in Singapore patients with vascular cognitive impairment, compared with cognitively normal controls (25).                                                                                                              |
| <b>RAGE</b> | Cell surface pattern recognition receptor. Triggers a pro-inflammatory response.                                                               | To the best of our knowledge, no studies have reported significant group differences in the context of human malaria.                                                                                                                                                                                                                            |

**CCL2**: chemokine (C-C motif) ligand 2; **CCL4**: chemokine (C-C motif) ligands 4; **CCL5**: chemokine (C-C motif) ligand 5; **CCL18**: chemokine (C-C motif) ligand 18; **CNS**: central nervous system; **CRP**: C-reactive protein; **CSF**: cerebrospinal fluid; **GM-CSF**: granulocyte-macrophage colony-stimulating factor; **IFN- $\gamma$** : interferon gamma; **IL-1 $\alpha$** : interleukin 1 alpha; **IL-1 $\beta$ \***: interleukin 1 beta; **IL-1RA**: interleukin 1RA; **IL-2**: interleukin 2; **IL-4\*\***: interleukin 4; **IL-6\***: interleukin 6; **IL-8**: interleukin 8; **IL-10**: interleukin 10; **IL-17A**: interleukin 17; **ILC**: innate lymphoid cells; **MIF**: migration inhibitory factor; **MPO**: myeloperoxidase; **NK**: natural killer; **OPN**: osteopontin; **RAGE**: receptor for advanced glycation end-products; **TNF- $\alpha$** : tumour Necrosis Factor alpha; **VSMC**: vascular smooth muscle cells.

\*May have anti-inflammatory functions. \*\*May have pro-inflammatory functions.

**Legend:** Clinical findings related to...

 *Plasmodium falciparum* malaria infection;  *Plasmodium vivax* malaria infection;  *Plasmodium knowlesi* malaria infection;  Neurological conditions.

## References:

1. Villaverde C, Namazzi R, Shabani E, *et al*. Retinopathy-Positive Cerebral Malaria Is Associated With Greater Inflammation, Blood-Brain Barrier Breakdown, and Neuronal Damage Than Retinopathy-Negative Cerebral Malaria. *J Pediatric Infect Dis Soc* (2020) 9(5):580–6.
2. Kho S, Anstey NM, Barber BE, *et al*. Diagnostic performance of a 5-plex malaria immunoassay in regions co-endemic for *Plasmodium falciparum*, *P. vivax*, *P. knowlesi*, *P. malariae* and *P. ovale*. *Scientific Reports* (2022) 12(1):1–9.
3. Peto TJ, Tripura R, Lee SJ, *et al*. Association between Subclinical Malaria Infection and Inflammatory Host Response in a Pre-Elimination Setting. *PLoS One* (2016) 11(7):e0158656.
4. Lima-Junior J da C, Rodrigues-da-Silva RN, Pereira VA, *et al*. Cells and mediators of inflammation (C-reactive protein, nitric oxide, platelets and neutrophils) in the acute and convalescent phases of uncomplicated *Plasmodium vivax* and *Plasmodium falciparum* infection. *Mem Inst Oswaldo Cruz* (2012) 107(8):1035–41.
5. Ndoricympaye EL, Van Snick J, Niyoyita J de D, *et al*. Integrated Analysis of Cytokine Profiles in Malaria Patients Discloses Selective Upregulation of TGF- $\beta$ 1,  $\beta$ 3, and IL-9 in Mild Clinical Presentation. *Int J Mol Sci* (2022) 23(20):12665.
6. Acero CT, Ramírez-Montoya J, Velasco MC, *et al*. IL-4, IL-10, CCL2 and TGF- $\beta$  as potential biomarkers for severity in *Plasmodium vivax* malaria. *PLoS Negl Trop Dis* (2022) 16(9):e0010798.
7. Mendonça VR, Queiroz AT, Lopes FM, *et al*. Networking the host immune response in *Plasmodium vivax* malaria. *Malar J* (2013) 12(1):1–11.
8. Mahittikorn A, Kwankaew P, Rattaprasert P, *et al*. Elevation of serum interleukin-1 $\beta$  levels as a potential indicator for malarial infection and severe malaria: a meta-analysis. *Malar J* (2022) 21(1):1–11.
9. Prakash D, Fesel C, Jain R, *et al*. Clusters of cytokines determine malaria severity in *Plasmodium falciparum*-infected patients from endemic areas of Central India. *J Infect Dis* (2006) 194(2):198–207.
10. Royo J, Vianou B, Accrombessi M, *et al*. Elevated plasma interleukin-8 as a risk factor for mortality in children presenting with cerebral malaria. *Infect Dis Poverty* (2023) 12(1):1–15.
11. Moncunill G, Mayor A, Bardají A, *et al*. Cytokine Profiling in Immigrants with Clinical Malaria after Extended Periods of Interrupted Exposure to *Plasmodium falciparum*. *PLoS One* (2013) 8(8):e73360.
12. Moncunill G, Mayor A, Jiménez A, *et al*. Cytokine and Antibody Responses to *Plasmodium falciparum* in Naïve Individuals during a First Malaria Episode: Effect of Age and Malaria Exposure. *PLoS One* (2013) 8(2):e55756.
13. Hojo-Souza NS, Pereira DB, De Souza FSH, *et al*. On the cytokine/chemokine network during *Plasmodium vivax* malaria: new insights to understand the disease. *Malar J* (2017) 16(1):1–10.
14. Raza A, Ghanchi NK, Zubairi ABS, *et al*. Tumor Necrosis Factor - $\alpha$ , Interleukin-10, Intercellular and Vascular Adhesion Molecules Are Possible Biomarkers of Disease Severity in Complicated *Plasmodium vivax* Isolates from Pakistan. *PLoS One* (2013) 8(12):e81363.
15. Obeng-Aboagye E, Frimpong A, Amponsah JA, *et al*. Inflammatory cytokines as potential biomarkers for early diagnosis of severe malaria in children in Ghana. *Malar J* (2023) 22(1):1–8.
16. Herbert F, Tchitchek N, Bansal D, *et al*. Evidence of IL-17, IP-10, and IL-10 involvement in multiple-organ dysfunction and IL-17 pathway in acute renal failure associated to *Plasmodium falciparum* malaria. *J Transl Med* (2015) 13(1):1–11.
17. Han C, Lin Y, Shan G, *et al*. Plasma concentration of malaria parasite-derived macrophage migration inhibitory factor in uncomplicated malaria patients correlates with parasitemia and disease severity. *Clin Vaccine Immunol* (2010) 17(10):1524–32.
18. Ngum NH, Fakeh NB, Lem AE, *et al*. Prevalence of malaria and associated clinical manifestations and myeloperoxidase amongst populations living in different altitudes of Mezam division, North West Region, Cameroon. *Malar J* (2023) 22(1):1–14.
19. Kinra P, Dutta V. Serum TNF alpha levels: a prognostic marker for assessment of severity of malaria. *Trop Biomed* (2013) 30(4):645–53.
20. Mandala WL, Msefula CL, Gondwe EN, *et al*. Monocyte activation and cytokine production in Malawian children presenting with *P. falciparum* malaria. *Parasite Immunol* (2016) 38(5):317–25.
21. Cox-Singh J, Singh B, Daneshvar C, *et al*. Anti-Inflammatory Cytokines Predominate in Acute Human *Plasmodium knowlesi* Infections. *PLoS One* (2011) 6(6):e20541.
22. Rodrigues da Silva RN, Lima Junior J da C, Fonseca e Fonseca B de P, *et al*. Alterations in cytokines and haematological parameters during the acute and convalescent phases of *Plasmodium falciparum* and *Plasmodium vivax* infections. *Mem Inst Oswaldo Cruz* (2014) 109(2):154–62.
23. Bujarbaruah D, Kalita MP, Baruah V, *et al*. RANTES levels as a determinant of *falciparum* malaria severity or recovery. *Parasite Immunol* (2017) 39(9):e12452.
24. Mortazavi SE, Lugaajju A, Kaddumukasa M, *et al*. Osteopontin and malaria: no direct effect on parasite growth, but correlation with *P. falciparum*-specific B cells and BAFF in a malaria endemic area. *BMC Microbiol* (2021) 21(1):1–13.
25. Chai YL, Chong JR, Raquib AR, *et al*. Plasma osteopontin as a biomarker of Alzheimer's disease and vascular cognitive impairment. *Sci Rep* (2021) 11(1):1–11.
