# Supplementary material for: Plasmodium knowlesi infection is associated with elevated circulating biomarkers of brain injury and endothelial activation
Source: bioRxiv or medRxiv preprint supplement (doi:10.1101/2024.04.25.24306382), 2024-04-26
Supplement: Supplementary file [file media-9.pdf]

# Supplementary Table 2. Vascular biomarkers

| Biomarker            | Description                                                                                                                                                                                                                                                                                   | Clinical significance                                                                                                                                                                                                                                                                                                                                                                                                                                                                                                                                                                                                                                                                                                                                                                                                                                                                                                                                                                                                                                                                                                                                                                                                                                                                                                                                                                        |
|----------------------|-----------------------------------------------------------------------------------------------------------------------------------------------------------------------------------------------------------------------------------------------------------------------------------------------|----------------------------------------------------------------------------------------------------------------------------------------------------------------------------------------------------------------------------------------------------------------------------------------------------------------------------------------------------------------------------------------------------------------------------------------------------------------------------------------------------------------------------------------------------------------------------------------------------------------------------------------------------------------------------------------------------------------------------------------------------------------------------------------------------------------------------------------------------------------------------------------------------------------------------------------------------------------------------------------------------------------------------------------------------------------------------------------------------------------------------------------------------------------------------------------------------------------------------------------------------------------------------------------------------------------------------------------------------------------------------------------------|
| <b>Ang-1</b>         | Vascular growth factor. Regulates angiogenesis, endothelial cell survival, and proliferation. Mediates blood vessel maturation and stability.                                                                                                                                                 |  A decline in Ang-1 plasma levels was associated with increasing <i>falciparum</i> and <i>vivax</i> malaria severity and widespread endothelial activation across African and Asian patient studies, irrespective of age (1–5).<br>                                                                                                                                                                                                                                                                                                                                                                                                                                                                                                                                                                                                                                                                                                                                                                                                                                                                                                                                                                                    |
| <b>Ang-2</b>         | Vascular growth factor, biomarker of endothelial activation. Modulates Ang-1 signalling, and in the absence of angiogenic inducers such as VEGF, promotes vascular regression. In concert with VEGF, triggers a permissive angiogenic signal. Involved in lymphangiogenesis.                  |  An increase of Ang-2 plasma levels was associated with increasing <i>falciparum</i> and <i>vivax</i> malaria severity and widespread endothelial activation across African and Asian patient studies, irrespective of age (1,3,5).<br><br> Robust predictor of mortality in <i>falciparum</i> cerebral malaria, identified as a risk factor for blood-brain barrier dysfunction, neuroinflammation, and long-term cognitive injury in African children (4,6,7).<br>                                                                                                                                                                                                                                                                                                                                                                                                                                                                                                                                                                             |
| <b>Ang2<br/>Ang1</b> | Ratio between Ang-2 and Ang-1 plasma levels.                                                                                                                                                                                                                                                  |  Plasma ratio was higher in patients with <i>falciparum</i> and <i>vivax</i> severe malaria compared with uncomplicated malaria and healthy controls, across African, Asian, and Latin American patient studies and irrespective of age.<br> Fatal cerebral malaria cases showed the highest ratio (1,2,5,8–10).                                                                                                                                                                                                                                                                                                                                                                                                                                                                                                                                                                                                                                                                                                                                                                                                                                                                                                       |
| <b>BMP-9</b>         | Growth factor, member of the TGF- $\beta$ superfamily. Regulates angiogenesis by inhibiting VEGF-induced endothelial cell migration and proliferation.                                                                                                                                        | To our knowledge, no studies have reported significant group differences in the context of human malaria.                                                                                                                                                                                                                                                                                                                                                                                                                                                                                                                                                                                                                                                                                                                                                                                                                                                                                                                                                                                                                                                                                                                                                                                                                                                                                    |
| <b>ICAM-1</b>        | Intercellular adhesion molecule constitutively expressed on the vascular endothelium. Upon IL-1 and TNF- $\alpha$ stimulation, expression levels increase, so that leukocytes can bind to it and transmigrate into tissues. Increased plasma levels are suggestive of endothelial activation. |  Plasma levels were significantly higher in Ugandan children with <i>falciparum</i> severe malaria, compared with healthy controls (4).<br> Plasma levels were higher in Malawian children with <i>falciparum</i> cerebral malaria and retinopathy, compared with their retinopathy-negative counterparts (11).<br> In Ugandan children with <i>falciparum</i> malaria, plasma levels were elevated in severe malarial anaemia fatalities compared to survivors (12).<br> In Ghanaian children with <i>falciparum</i> cerebral malaria, plasma levels were higher compared with uncomplicated malaria cases (13).<br> In Pakistani patients with <i>vivax</i> malaria, plasma levels were significantly higher in uncomplicated cases than healthy controls, and higher again in complicated cases compared with uncomplicated ones. ICAM-1, VCAM-1, TNF- $\alpha$ and IL-10 were the best individual predictors of complicated <i>vivax</i> malaria (14). |
| <b>PDGF-AA</b>       | Angiogenic promoter. Plays an important role in wound healing, and it is essential during embryonic development.                                                                                                                                                                              |  Increased plasma levels predicted abnormal cerebral blood flow and stroke in children with sickle cell disease who presented with cerebrovascular disease (15).                                                                                                                                                                                                                                                                                                                                                                                                                                                                                                                                                                                                                                                                                                                                                                                                                                                                                                                                                                                                                                                                                                                                        |
| <b>PDGF-BB</b>       | Angiogenic promoter. Participates in wound healing, blood vessel development, and proliferation and recruitment of pericytes and vascular smooth muscle cells in the central nervous system.                                                                                                  |  In Ugandan children with <i>falciparum</i> cerebral malaria, plasma levels were significantly higher in retinopathy-negative patients, compared to their retinopathy-positive peers (16).<br>                                                                                                                                                                                                                                                                                                                                                                                                                                                                                                                                                                                                                                                                                                                                                                                                                                                                                                                                                                                                                     |
| <b>Serpin E1</b>     | Serine protease inhibitor. Plays a role in the controlled degradation of blood clots.                                                                                                                                                                                                         | To our knowledge, no studies have reported significant group differences in the context of human malaria.                                                                                                                                                                                                                                                                                                                                                                                                                                                                                                                                                                                                                                                                                                                                                                                                                                                                                                                                                                                                                                                                                                                                                                                                                                                                                    |
| <b>VCAM-1</b>        |                                                                                                                                                                                                                                                                                               |  Plasma levels were significantly higher in Ugandan children with <i>falciparum</i> severe malaria, compared with healthy controls (4).                                                                                                                                                                                                                                                                                                                                                                                                                                                                                                                                                                                                                                                                                                                                                                                                                                                                                                                                                                                                                                                                                                                                                                 |

|               |                                                                                                                                                                                                      |                                                                                                                                                                                                                                                                                                                                                          |                                                                                                                                                                                                                                                                                                                                                                                                                                                                                                                                                                                                                       |
|---------------|------------------------------------------------------------------------------------------------------------------------------------------------------------------------------------------------------|----------------------------------------------------------------------------------------------------------------------------------------------------------------------------------------------------------------------------------------------------------------------------------------------------------------------------------------------------------|-----------------------------------------------------------------------------------------------------------------------------------------------------------------------------------------------------------------------------------------------------------------------------------------------------------------------------------------------------------------------------------------------------------------------------------------------------------------------------------------------------------------------------------------------------------------------------------------------------------------------|
|               | Surface glycoprotein expressed on the vascular endothelium. Participates in immune surveillance and inflammation by regulating leukocyte adhesion to the endothelium and transendothelial migration. |                                                                                                                                                                                                                                                                       | In Pakistani patients with <i>vivax</i> malaria, plasma levels were significantly higher in uncomplicated cases than healthy controls, and higher again in complicated cases compared with uncomplicated ones. VCAM-1, ICAM-1, TNF- $\alpha$ and IL-10 were the best individual predictors of complicated <i>vivax</i> malaria (14).                                                                                                                                                                                                                                                                                  |
| <b>VEGF</b>   | Vascular growth factor. Promotes angiogenesis, vasculogenesis, and endothelial cell growth. Induces endothelial cell proliferation, cell migration, and permeabilization of blood vessels.           | <br>                                                                                                                                                                               | Plasma levels were significantly higher in Indonesian patients with <i>falciparum</i> malaria compared with healthy controls (17).<br>Serum levels were significantly lower in Indian patients with <i>vivax</i> severe malaria compared with uncomplicated malaria and healthy controls (5).                                                                                                                                                                                                                                                                                                                         |
| <b>vWF-A2</b> | Glycoprotein involved in haemostasis, biomarker of endothelial activation. Promotes adhesion of platelets to sites of vascular injury and acts as a chaperone for certain coagulation factors.       | <br><br><br> | Plasma levels were significantly higher in Ugandan children with <i>falciparum</i> severe malaria, compared with healthy controls (4); increased plasma levels were associated with mortality (18).<br>Plasma levels were significantly higher in Malawian children with cerebral malaria than in children with uncomplicated malaria, showing similar values in patients with and without retinopathy (19).<br>Plasma levels were significantly increased in Malaysian patients with severe and uncomplicated <i>vivax</i> malaria, compared with controls, and correlated with parasitaemia in these patients (20). |

**Ang-1:** angiopoietin-1; **Ang-2:** angiopoietin-2; **Ang-2/Ang-1:** ratio between Ang-2 and Ang-1; **BMP-9:** bone morphogenetic protein 9; **ICAM-1:** intercellular adhesion molecule 1; **PDGF-AA:** platelet-derived growth factor AA; **PDGF-BB:** platelet-derived growth factor BB; **VCAM-1:** vascular cell adhesion molecule; **Serpin E1:** Serine Proteinase Inhibitor-clade E1; **PEDF:** pigment epithelium derived factor; **VEGF:** vascular endothelial growth factor; **vWF-A2:** von Willebrand Factor (A2 domain).

**Legend:** Clinical findings related to...

 *Plasmodium falciparum* malaria infection;  *Plasmodium vivax* malaria infection;  *Plasmodium knowlesi* malaria infection;  
 Neurological conditions;  Other medical conditions.

## References:

1. De Jong GM, Slager JJ, Verbon A, *et al.* Systematic review of the role of angiotensin-1 and angiotensin-2 in *Plasmodium* species infections: biomarkers or therapeutic targets? *Malar J* (2016) 15(1):1–12.
2. Jain V, Lucchi NW, Wilson NO, *et al.* Plasma levels of angiotensin-1 and -2 predict cerebral malaria outcome in Central India. *Malar J* (2011) 10(1):1–7.
3. Conroy AL, Glover SJ, Hawkes M, *et al.* Angiotensin-2 levels are associated with retinopathy and predict mortality in Malawian children with cerebral malaria: A retrospective case-control study. *Crit Care Med* (2012) 40(3):952–9.
4. Ouma BJ, Ssenkusu JM, Shabani E, *et al.* Endothelial Activation, Acute Kidney Injury, and Cognitive Impairment in Pediatric Severe Malaria. *Crit Care Med* (2020) 48(9):E734–43.
5. Gowda S, Anghan H, Mishra H, *et al.* Serum Angiotensin-1 and -2 and VEGF are associated with severe disease in *vivax* malaria. *J Vector Borne Dis* (2020) 57(4):285–94.
6. Petersen JEV, Mkumbaye SI, Vaaben A V, *et al.* Plasma Ang2 and ADAM17 levels are elevated during clinical malaria; Ang2 level correlates with severity and expression of EPCR-binding PfEMP1. *Scientific Reports* (2016) 6(1):1–9.
7. Ouma BJ, Bangirana P, Ssenkusu JM, *et al.* Plasma angiotensin-2 is associated with age-related deficits in cognitive sub-scales in Ugandan children following severe malaria. *Malar J* (2021) 20(1):1–10.
8. Gomes LT, Alves- ER, Rodrigues-Jesus C, *et al.* Angiotensin-2 and Angiotensin-2/Angiotensin-1 Ratio as Indicators of Potential Severity of *Plasmodium vivax* Malaria in Patients with Thrombocytopenia. *PLoS One* (2014) 9(10):e109246.
9. Jain V, Thomas T, Basak S, *et al.* Sequential dysregulated plasma levels of angiotensins (ANG-2 and ratios of ANG-2/ANG-1) are associated with malaria severity and mortality among hospital admitted cases in South Bastar Region of Chhattisgarh, Central India. *Pathog Glob Health* (2022) 116(1):47–58.
10. Oluboyo AO, Chukwu SI, Oluboyo BO, Odewusi OO. Evaluation of Angiotensins 1 and 2 in Malaria-Infested Children. *J Environ Public Health*. 2020;2020.
11. Conroy AL, Phiri H, Hawkes M, Glover S, Mallewa M, Seydel KB, *et al.* Endothelium-Based Biomarkers Are Associated with Cerebral Malaria in Malawian Children: A Retrospective Case-Control Study. *PLoS One* [Internet]. 2010 [cited 2024 Jan 26];5(12):e15291. Available from: <https://journals.plos.org/plosone/article?id=10.1371/journal.pone.0015291>
12. Erdman LK, Dhabangi A, Musoke C, Conroy AL, Hawkes M, Higgins S, *et al.* Combinations of Host Biomarkers Predict Mortality among Ugandan Children with Severe Malaria: A Retrospective Case-Control Study. *PLoS One* [Internet]. 2011 [cited 2024 Jan 26];6(2):e17440. Available from: <https://journals.plos.org/plosone/article?id=10.1371/journal.pone.0017440>
13. Adukpo S, Kusi KA, Ofori MF, Tetteh JKA, Amoako-Sakyi D, Goka BQ, *et al.* High Plasma Levels of Soluble Intercellular Adhesion Molecule (ICAM)-1 Are Associated with Cerebral Malaria. *PLoS One* [Internet]. 2013 Dec 27 [cited 2024 Jan 26];8(12):e84181. Available from: <https://journals.plos.org/plosone/article?id=10.1371/journal.pone.0084181>
14. Raza A, Ghanchi NK, Zubairi ABS, *et al.* Tumor Necrosis Factor - $\alpha$ , Interleukin-10, Intercellular and Vascular Adhesion Molecules Are Possible Biomarkers of Disease Severity in Complicated *Plasmodium vivax* Isolates from Pakistan. *PLoS One* (2013) 8(12):e81363.
15. Hyacinth HI, Gee BE, Adamkiewicz T V, *et al.* Plasma BDNF and PDGF-AA levels are associated with high TCD velocity and stroke in children with sickle cell anemia. *Cytokine* (2012) 60(1):302–8.
16. Villaverde C, Namazzi R, Shabani E, *et al.* Retinopathy-Positive Cerebral Malaria Is Associated With Greater Inflammation, Blood-Brain Barrier Breakdown, and Neuronal Damage Than Retinopathy-Negative Cerebral Malaria. *J Pediatric Infect Dis Soc* (2020) 9(5):580–6.
17. Brouwers J, Noviyanti R, Fijnheer R, *et al.* Platelet Activation Determines Angiotensin-1 and VEGF Levels in Malaria: Implications for Their Use as Biomarkers. *PLoS One* (2013) 8(6):e64850.
18. Graham SM, Chen J, Chung DW, *et al.* Endothelial activation, haemostasis and thrombosis biomarkers in Ugandan children with severe malaria participating in a clinical trial. *Malar J* (2016) 15(1):1–9.
19. Phiri HT, Bridges DJ, Glover SJ, *et al.* Elevated Plasma Von Willebrand Factor and Propeptide Levels in Malawian Children with Malaria. *PLoS One* (2011) 6(11):e25626.
20. Barber BE, William T, Grigg MJ, *et al.* Parasite Biomass-Related Inflammation, Endothelial Activation, Microvascular Dysfunction and Disease Severity in *Vivax* Malaria. *PLoS Pathog* (2015) 11(1):e1004558.
