# Supplementary material for: Plasmodium knowlesi infection is associated with elevated circulating biomarkers of brain injury and endothelial activation
Source: bioRxiv or medRxiv preprint supplement (doi:10.1101/2024.04.25.24306382), 2024-04-26
Supplement: Supplementary file [file media-11.pdf]

## Supplementary Table 3

Individual biomarker group comparisons (Wilcoxon test)

|                                             | Healthy controls<br>(N=19)<br>Median pg/mL (IQR) | <i>Pk</i> -infected patients<br>(N=19)<br>Median pg/mL (IQR) | Crude<br>P value  | Corrected*<br>P value |
|---------------------------------------------|--------------------------------------------------|--------------------------------------------------------------|-------------------|-----------------------|
| <b><math>\alpha</math>Syn</b>               | 863.4 (259.9)                                    | 2,177.8 (392.4)                                              | <b>&lt;0.0001</b> | <b>&lt;0.0001</b>     |
| <b>APP</b>                                  | 36,082.0 (25,945.0)                              | 17,701 (12,728.0)                                            | <b>0.0010</b>     | 0.05                  |
| <b>A<math>\beta</math><sub>(1-42)</sub></b> | 0.2 (1.2)                                        | 1.6 (0.9)                                                    | 0.08              | 1.00                  |
| <b>BDNF</b>                                 | 1,516.2 (1,454.1)                                | 146.2 (115.8)                                                | <b>&lt;0.0001</b> | <b>&lt;0.0001</b>     |
| <b>CaBD</b>                                 | 1,807.0 (179.0)                                  | 1,151.1 (221.0)                                              | <b>&lt;0.0001</b> | <b>&lt;0.0001</b>     |
| <b>CNTN1</b>                                | 18,191.0 (4,890.0)                               | 6,179.7 (2,615.6)                                            | <b>&lt;0.0001</b> | <b>&lt;0.0001</b>     |
| <b>ENO2/NSE</b>                             | 54,324.0 (21,601.0)                              | 1,094,366.0 (1,382,298.0)                                    | <b>0.0010</b>     | 0.05                  |
| <b>Fetuin A</b>                             | 176,390,803.0 (38,746,703.0)                     | 154,460,943.0 (47,209,645.0)                                 | <b>0.0462</b>     | 1.00                  |
| <b>GFAP</b>                                 | 78.1 (45.8)                                      | 29.9 (25.3)                                                  | <b>&lt;0.0001</b> | <b>0.0013</b>         |
| <b>KLK6</b>                                 | 2,319.5 (915.0)                                  | 1,072.4 (788.7)                                              | <b>0.0003</b>     | <b>0.0126</b>         |
| <b>Lipocalin 2</b>                          | 547,608.0 (149,670.0)                            | 619,695.0 (94,135.0)                                         | 0.05              | 1.00                  |
| <b>NCAM-1</b>                               | 107,813.0 (38,204.0)                             | 70,203.0 (8,851.0)                                           | <b>&lt;0.0001</b> | <b>&lt;0.0001</b>     |
| <b>NfL</b>                                  | 8.1 (4.4)                                        | 6.3 (5.8)                                                    | 0.21              | 1.00                  |
| <b>NGF-<math>\beta</math></b>               | 0.9 (1.2)                                        | 1.7 (1.5)                                                    | <b>0.0203</b>     | 1.00                  |
| <b>NRGN</b>                                 | 22.4 (11.1)                                      | 241.4 (763.1)                                                | <b>&lt;0.0001</b> | <b>0.0022</b>         |
| <b>Park7</b>                                | 71,436.0 (61,372.0)                              | 161,810.0 (146,171.0)                                        | <b>&lt;0.0001</b> | <b>0.0006</b>         |
| <b>S100B</b>                                | 27.3 (0.0)                                       | 1,282.2 (1,777.2)                                            | <b>&lt;0.0001</b> | <b>&lt;0.0001</b>     |
| <b>Tau total</b>                            | 0.6 (0.6)                                        | 3.7 (5.0)                                                    | <b>&lt;0.0001</b> | <b>0.0007</b>         |
| <b>TDP-43</b>                               | 5,344.3 (5,806.0)                                | 67,143.0 (90,407.0)                                          | <b>&lt;0.0001</b> | <b>0.0050</b>         |
| <b>UCHL-1</b>                               | 49.3 (45.4)                                      | 336.6 (184.1)                                                | <b>&lt;0.0001</b> | <b>&lt;0.0001</b>     |
| <b>YKL40</b>                                | 29,591.0 (24,732.0)                              | 58,674.0 (33,187.0)                                          | <b>0.0020</b>     | 0.10                  |

\*Bonferroni correction for multiple comparisons.

|                                                      |                            | Healthy controls<br>(N=19)<br>Median pg/mL (IQR) | <i>Pk</i> -infected patients<br>(N=19)<br>Median pg/mL (IQR) | Crude<br>P value        | Corrected*<br>P value |                   |
|------------------------------------------------------|----------------------------|--------------------------------------------------|--------------------------------------------------------------|-------------------------|-----------------------|-------------------|
| <b>Biomarkers of infection and immune activation</b> | Pro-inflammatory cytokines | <b>CRP</b>                                       | 668,496.0 (308,499.0)                                        | 477,838.0 (235,914.0)   | <b>0.0005</b>         | <b>0.0280</b>     |
|                                                      |                            | <b>GM-CSF</b>                                    | 23.8 (10.0)                                                  | 21.52 (8.7)             | 0.24                  | 1.00              |
|                                                      |                            | <b>IFN<math>\gamma</math></b>                    | 101.4 (11.8)                                                 | 104.8 (46.3)            | 0.73                  | 1.00              |
|                                                      |                            | <b>IL-1<math>\alpha</math></b>                   | 49.0 (46.4)                                                  | 46.0 (21.2)             | 0.29                  | 1.00              |
|                                                      |                            | <b>IL-1<math>\beta</math></b>                    | 24.7 (7.2)                                                   | 40.0 (17.9)             | <b>0.0027</b>         | 0.14              |
|                                                      |                            | <b>IL-2</b>                                      | 34.8 (28.7)                                                  | 33.1 (62.5)             | 0.53                  | 1.00              |
|                                                      |                            | <b>IL-6</b>                                      | 11.5 (2.6)                                                   | 21.7 (19.2)             | <b>0.0013</b>         | 0.06              |
|                                                      |                            | <b>IL-8</b>                                      | 319.7 (599.0)                                                | 254.6 (2,353.2)         | 0.82                  | 1.00              |
|                                                      |                            | <b>IL-17A</b>                                    | 29.2 (6.1)                                                   | 22.2 (8.3)              | <b>0.0081</b>         | 0.41              |
|                                                      |                            | <b>MIF</b>                                       | 384.6 (315.8)                                                | 630.7 (321.2)           | <b>0.0022</b>         | 0.11              |
|                                                      |                            | <b>MPO</b>                                       | 1,571,073.0 (869,998.0)                                      | 3,176,104.0 (919,812.0) | <b>0.0006</b>         | <b>0.0314</b>     |
|                                                      | Anti-inflammatory          | <b>TNF-<math>\alpha</math></b>                   | 16.2 (5.7)                                                   | 13.7 (2.3)              | <b>0.0393</b>         | 1.00              |
|                                                      |                            | <b>IL-1RA</b>                                    | 6,736.0 (2,506.0)                                            | 35,639.0 (21,569.0)     | <b>&lt;0.0001</b>     | <b>&lt;0.0001</b> |
|                                                      |                            | <b>IL-4</b>                                      | 165.1 (12.2)                                                 | 159.8 (35.1)            | 0.44                  | 1.00              |
|                                                      | Chemokines                 | <b>IL-10</b>                                     | 8.0 (1.3)                                                    | 48.6 (116.0)            | <b>&lt;0.0001</b>     | <b>&lt;0.0001</b> |
|                                                      |                            | <b>CCL2</b>                                      | 380.8 (326.0)                                                | 160.9 (219.4)           | <b>0.0075</b>         | 0.38              |
|                                                      |                            | <b>CCL4</b>                                      | 781.8 (250.0)                                                | 526.3 (47.7)            | <b>&lt;0.0001</b>     | <b>0.0002</b>     |
|                                                      |                            | <b>CCL5</b>                                      | 158,730.0 (96,050.0)                                         | 17,650.0 (27,045.0)     | <b>&lt;0.0001</b>     | <b>&lt;0.0001</b> |
|                                                      | Other                      | <b>CCL18</b>                                     | 76,800.0 (37,565.0)                                          | 76,703.9 (73,970.5)     | 0.89                  | 1.00              |
| <b>OPN</b>                                           |                            | 12,981.0 (11,051.0)                              | 5,057.0 (3,291.0)                                            | <b>0.0033</b>           | 0.17                  |                   |
| <b>RAGE</b>                                          |                            | 7,206.0 (2,599.0)                                | 4,797.0 (1,840.0)                                            | <b>&lt;0.0001</b>       | <b>0.0025</b>         |                   |

\*Bonferroni correction for multiple comparisons.

|                          | Healthy controls<br>(N=19)<br>Median pg/mL (IQR) | <i>Pk</i> -infected patients<br>(N=19)<br>Median pg/mL (IQR) | Crude<br>P value  | Corrected*<br>P value |
|--------------------------|--------------------------------------------------|--------------------------------------------------------------|-------------------|-----------------------|
|                          | <b>Ang-1</b>                                     | 51,807.0 (23,226.0)                                          | 1,547.8 (1,633.8) | <0.0001               |
| <b>Ang-2</b>             | 3,187.0 (1,277.0)                                | 2,561.7 (1,365.2)                                            | 0.0471            | 1.00                  |
| <b>Ang-2/Ang-1 ratio</b> | 0.1 (0.1)                                        | 1.5 (0.6)                                                    | <0.0001           | <0.0001               |
| <b>BMP-9</b>             | 205.9 (193.2)                                    | 3.6 (2.3)                                                    | <0.0001           | <0.0001               |
| <b>ICAM-1</b>            | 705,782.0 (710,688.0)                            | 832,537.0 (324,397.0)                                        | 0.98              | 1.00                  |
| <b>PDGF AA</b>           | 3,864.0 (689.0)                                  | 552.6 (346.2)                                                | <0.0001           | <0.0001               |
| <b>PDGF BB</b>           | 18,495.0 (7,646.0)                               | 1,385.7 (2,055.8)                                            | <0.0001           | <0.0001               |
| <b>Serpin E1</b>         | 932,450.0 (468,184.0)                            | 183,488.0 (103,411.0)                                        | <0.0001           | <0.0001               |
| <b>VCAM-1</b>            | 698,022.0 (419,633.0)                            | 1,673,430.0 (2,154,222.0)                                    | <0.0001           | 0.0001                |
| <b>VEGF</b>              | 147.3 (81.2)                                     | 178.9 (118.7)                                                | 0.26              | 1.00                  |
| <b>vWF</b>               | 6,716.8 (8,770.7)                                | 6,173.0 (3,737.2)                                            | 0.20              | 1.00                  |

\*Bonferroni correction for multiple comparisons.

#### Biomarkers of brain alterations or cerebral injury:

**αSyn**: alpha-Synuclein; **APP**: amyloid-beta precursor protein; **Aβ<sub>1-42</sub>**: amyloid beta (1-42); **BDNF**: brain-derived neurotrophic factor; **CaBP**: Calbindin D; **CNTN1**: contactin-1; **CSF**: cerebrospinal fluid; **ENO2 / NSE**: Enolase 2 / Neuron-specific Enolase; **GFAP**: glial fibrillary acidic protein; **KLK6**: kallikrein 6 / neurosin; **NCAM-1**: neural cell adhesion molecule; **Lipocalin-2**: neutrophil gelatinase-associated lipocalin; **NGF-β**: nerve growth factor beta; **NfL**: neurofilament light chain; **NRGN**: neurogranin; **Park7**: Parkinsonism-associated deglycase; **S100B**: S100 calcium-binding protein β; **TDP-43**: TAR DNA-binding protein 43; **Tau**: total Tau protein; **UCH-L1**: ubiquitin carboxy-terminal hydrolase L1; **YKL40**: Chitinase-3-like protein 1.

#### Biomarkers of infection and immune activation:

**CCL2**: chemokine (C-C motif) ligand 2; **CCL4**: chemokine (C-C motif) ligand 4; **CCL5**: chemokine (C-C motif) ligand 5; **CCL18**: chemokine (C-C motif) ligand 18; **CRP**: C-reactive protein; **GM-CSF**: granulocyte-macrophage colony-stimulating factor; **IFN-γ**: interferon gamma; **IL-1α**: interleukin 1 alpha; **IL-1β**: interleukin 1 beta; **IL-1RA**: interleukin 1RA; **IL-2**: interleukin 2; **IL-4**: interleukin 4; **IL-6**: interleukin 6; **IL-8**: interleukin 8; **IL-10**: interleukin 10; **IL-17A**: interleukin 17; **MIF**: migration inhibitory factor; **MPO**: myeloperoxidase; **OPN**: osteopontin; **RAGE**: receptor for advanced glycation end-products; **TNF-α**: tumour Necrosis Factor alpha.

#### Vascular biomarkers:

**Ang-1**: angiotensin-1; **Ang-2**: angiotensin-2; **Ang-2/Ang-1**: ratio between Ang-2 and Ang-1; **BMP-9**: bone morphogenetic protein 9; **ICAM-1**: intercellular adhesion molecule 1; **PDGF-AA**: platelet-derived growth factor AA; **PDGF-BB**: platelet-derived growth factor BB; **Serpin E1**: Serine Proteinase Inhibitor-clade E1; **VCAM-1**: vascular cell adhesion molecule; **VEGF**: vascular endothelial growth factor; **vWF-A2**: von Willebrand Factor (A2 domain). *Pk*: *Plasmodium knowlesi*; **IQR**: interquartile range.
